# Supplementary material
Source: MDPI journal article supplement (https://www.mdpi.com/2674-1024/2/1/7)
Supplement: s1 [file s1]

**Table S1. Standardization of stress imparting concentration of PEG.**

| PEG stress | Shoot length (cm) | Fresh weight (g) | Dry weight (g) | Total chlorophyll (mg/g fw) |
|------------|-------------------|------------------|----------------|-----------------------------|
| Control    | 12.033±0.088      | 0.75±0.0038      | 0.0733±0.0019  | 3.16856±0.136               |
| 5% PEG     | 11.5±0.058        | 0.675556±0.0123  | 0.0616±0.0009  | 2.9008±0.080                |
| 10% PEG    | 9.533±0.145       | 0.571111±0.0048  | 0.0566±0.0019  | 1.916377±0.092              |
| 15% PEG    | 6.333±0.088       | 0.408889±0.0029  | 0.0366±0.0019  | 1.59633±0.013               |
| 20% PEG    | 3.366±0.08        | 0.26±0.00509     | 0.014±0.00138  | 1.368997±0.03               |
| 25% PEG    | 1.933±0.088       | 0.035556±0.0029  | 0.006±0.0019   | 0.51881±0.017               |

**Table S2. Fixation of priming concentration of BABA and PEG based on shoot length, fresh weight, dry weight and total chlorophyll content.**

| BABA priming | Shoot length (cm) | Fresh weight (g) | Dry weight (g) | Total chlorophyll (mg/g fw) |
|--------------|-------------------|------------------|----------------|-----------------------------|
| 0 mM         | 11.91±0.13        | 0.736±0.007      | 0.0708±0.004   | 3.197±0.031                 |
| 0.5 mM       | 13±0.11           | 0.750±0.007      | 0.073±0.002    | 3.450±0.076                 |
| 1.0 mM       | 13.03±0.08        | 0.750±0.014      | 0.073±0.004    | 3.731±0.06                  |
| 1.5 mM       | 13.23±0.14        | 0.752±0.010      | 0.074±0.0015   | 3.947±0.039                 |
| 2.0 mM       | 12.93±0.14        | 0.740±0.009      | 0.0726±0.004   | 3.781±0.014                 |
| 2.5 mM       | 12.56±0.23        | 0.733±0.009      | 0.0701±0.0045  | 3.701±0.048                 |
| Stress       | 5.96±0.088        | 0.393±0.0317     | 0.0363±0.004   | 1.624±0.008                 |
| 0.5 mM + S   | 6.93±0.23         | 0.398±0.026      | 0.0399±0.0034  | 1.76±0.018                  |
| 1.0 mM + S   | 7.3±0.17          | 0.406±0.043      | 0.040±0.003    | 1.779±0.025                 |
| 1.5 mM + S   | 7.32±0.20         | 0.41±0.036       | 0.052±0.0030   | 1.791±0.027                 |
| 2.0 mM + S   | 6.83±0.08         | 0.403±0.023      | 0.0466±0.0046  | 1.75±0.028                  |
| 2.5 mM + S   | 6.06±0.12         | 0.4±0.05         | 0.04±0.0028    | 1.69±0.05                   |

| PEG priming | Shoot length (cm) | Fresh weight (g) | Dry weight (g) | Total chlorophyll<br>(mg/g fw) |
|-------------|-------------------|------------------|----------------|--------------------------------|
| 0           | 12.06±0.12        | 0.736±0.012      | 0.07±0.0057    | 3.17±0.137                     |
| 5%          | 12.53±0.26        | 0.75±0.0057      | 0.073±0.0015   | 3.38±0.0828                    |
| 10%         | 13.3±0.152        | 0.7516±0.010     | 0.074±0.0032   | 3.79±0.0514                    |
| 15%         | 13.06±0.066       | 0.75±0.0115      | 0.073±0.0011   | 3.785±0.079                    |
| 20%         | 12.7±0.152        | 0.739±0.010      | 0.073±0.0036   | 3.606±0.003                    |
| 25%         | 12.5±0.305        | 0.733±0.01       | 0.069±0.0046   | 3.559±0.0215                   |
| Stress      | 6.033±0.145       | 0.383±0.044      | 0.036±0.0032   | 1.647±0.031                    |
| 5% + S      | 6.666±0.317       | 0.396±0.0218     | 0.039±0.0037   | 1.692±0.03                     |
| 10% + S     | 7.36±0.185        | 0.403±0.0328     | 0.0475±0.002   | 1.732±0.05                     |
| 15% + S     | 6.833±0.1452      | 0.4±0.020817     | 0.0473±0.0017  | 1.697±0.01                     |
| 20% + S     | 6.733±0.348       | 0.393±0.008      | 0.046±0.0026   | 1.634±0.014                    |
| 25% + S     | 6.4±0.1           | 0.391±0.0428     | 0.041±0.0026   | 1.624±0.023                    |
